# Supplementary material
Source: MDPI journal article supplement (https://www.mdpi.com/2071-1050/14/6/3325)
Supplement: s1 [file s1]

## Supplementary Material

**Table S1.** Documentation consulted in each case study and communication with key informants

| Case | Documentation Consulted                                                                                                                                                 | Means of Communication              | Contact Frequency                                      |
|------|-------------------------------------------------------------------------------------------------------------------------------------------------------------------------|-------------------------------------|--------------------------------------------------------|
| TP1  | D1 - General certification procedure document<br>D2 – Request form for inscription into the organic agriculture regime<br>D3 – Annual fees document                     | - Meeting<br>- Email<br>- Telephone | 5 times in 6 months                                    |
| TP2  | D4 - General certification procedure document<br>D5 – Certification request form<br>D6 – Fees document                                                                  | - Email                             | 3 times in 6 months                                    |
| TP3  | D7 - General certification procedure document<br>D8 – Certification request form                                                                                        | - Email                             | Twice in 6 months                                      |
| PGS1 | D9 – Statement of liability<br>D10 – Entrance request form<br>D11 – PGS manifesto<br>D12 – Report on activities, 2015                                                   | - Meeting<br>- Telephone<br>- Email | Ongoing communication Framework project steering group |
| PGS2 | D13 – Letter of commitment<br>D14 – Operating manual<br>D15 – Entrance approval<br>D16 – Principles/objectives document<br>D17 – Introduction to the PGS's document     | - Meeting<br>- Telephone<br>- Email | Bimonthly                                              |
| PGS3 | D18 – New producers form<br>D19 – Entrance statement of liability<br>D20 – Internal rules v1505 document<br>D21 – Certificate of conformity                             | - Meeting<br>- Telephone<br>- Email | Ongoing communication Framework project steering group |
| PGS4 | D22 – New producers form<br>D23 – Entrance statement of liability<br>D24 – Internal rules document                                                                      | - Meeting<br>- Telephone<br>- Email | Monthly                                                |
| PGS5 | D25 – New producers form<br>D26 – Entrance statement of liability<br>D27 – Internal rules document                                                                      | - Meeting<br>- Telephone<br>- Email | Monthly                                                |
| PGS6 | D28 – Entrance form Annex II<br>D29 – Entrance motivation letter<br>D30 – Website (Internal structure, entrance procedure and PGS's operational rules)                  | - Meeting<br>- Telephone<br>- Email | Ongoing communication Framework project steering group |
| PGS7 | D31 – Membership form<br>D32 – Confirmation of Commitment<br>D33 – Conformity assessment form<br>D34 – Process of creation document<br>D35 – Label presentation Annex 1 | - Meeting<br>- Telephone<br>- Email | Monthly                                                |
| PGS8 | D36 – New producers admission criteria<br>D37 – PGS's principles                                                                                                        | - Meeting<br>- Telephone<br>- Email | Bimonthly                                              |

Source: Compiled by the authors

**Table S2.** Development of tasks in the entry procedure of both guarantee systems, and the agents responsible

| Task                                   | Subtasks Associated                                                                      | Person/Body with Overall Responsibility |                                             |
|----------------------------------------|------------------------------------------------------------------------------------------|-----------------------------------------|---------------------------------------------|
|                                        |                                                                                          | PGS                                     | Third-Party                                 |
| Initial Contact and Entry Procedure    | Request for documentation<br>Receipt of documentation Receipt of fee.                    | General assembly or commission          | Administration office of Certification body |
| Commitment declaration                 | Receipt of documentation                                                                 | General assembly or commission          | Administration office of Certification body |
| Self-evaluation                        | Receipt of the documentation<br>Documentation review                                     | General assembly or commission          | Certification body and Auditor              |
| Audit/Initial visit                    | Audit or Initial visit development<br>Complete the visit checklist<br>Write visit report | Visiting Group                          | Auditor                                     |
| Transition period/PGSs integration     | Decision about the transition period required                                            | General assembly or commission          | Certification Committee                     |
| Decision on the Entry of the applicant | Positive or negative decision on the application                                         | General assembly or commission          | Certification Committee                     |

Source: Compiled by the authors

**Table S3.** Development of tasks in the follow-up procedure of both guarantee systems, and the agents responsible.

| Task                        | Subtasks Associated                                                                                   | Person/Body with Overall Responsibility                         |                                      |
|-----------------------------|-------------------------------------------------------------------------------------------------------|-----------------------------------------------------------------|--------------------------------------|
|                             |                                                                                                       | PGS                                                             | Third-Party                          |
| Follow-up visits            | Carry out the visit<br>Complete the visit checklist<br>Complete the visit report or inspection report | Visiting Group                                                  | Auditor                              |
| Analytics                   | Sample collection on farm                                                                             | Visiting Group                                                  | Auditor                              |
| Evaluation of visits        | Assessment and evaluation of the visit report                                                         | General assembly or commission together with the visiting group | Auditor or Certification Committee   |
| Membership renewal decision | Making the decision - recommendations and sanctions                                                   | General assembly or commission                                  | Certification Committee and Director |
| Field notebook              | Evaluate the field notebook                                                                           |                                                                 | Auditor                              |

Source: Compiled by the authors.
